# Supplementary material
Source: publisher figshare collection journal article supplement (https://acs.figshare.com/ndownloader/files/4758037)
Supplement: Supplementary file 1 [file 4758037]

  
data_sssbfhex 
  
_audit_creation_method            SHELXL-97 
_chemical_name_systematic 
; 
 ? 
; 
_chemical_name_common             ? 
_chemical_melting_point           ? 
_chemical_formula_moiety          ? 
_chemical_formula_sum 
 'C42 H36 F6 O8 P2 Rh Sb' 
_chemical_formula_weight          1069.31 
  
loop_ 
 _atom_type_symbol 
 _atom_type_description 
 _atom_type_scat_dispersion_real 
 _atom_type_scat_dispersion_imag 
 _atom_type_scat_source 
 'C'  'C'   0.0033   0.0016 
 'International Tables Vol C Tables 4.2.6.8 and 6.1.1.4' 
 'H'  'H'   0.0000   0.0000 
 'International Tables Vol C Tables 4.2.6.8 and 6.1.1.4' 
 'O'  'O'   0.0106   0.0060 
 'International Tables Vol C Tables 4.2.6.8 and 6.1.1.4' 
 'F'  'F'   0.0171   0.0103 
 'International Tables Vol C Tables 4.2.6.8 and 6.1.1.4' 
 'P'  'P'   0.1023   0.0942 
 'International Tables Vol C Tables 4.2.6.8 and 6.1.1.4' 
 'Rh'  'Rh'  -1.1178   0.9187 
 'International Tables Vol C Tables 4.2.6.8 and 6.1.1.4' 
 'Sb'  'Sb'  -0.5866   1.5461 
 'International Tables Vol C Tables 4.2.6.8 and 6.1.1.4' 
  
_symmetry_cell_setting            Triclinic 
_symmetry_space_group_name_H-M    P-1 
  
loop_ 
 _symmetry_equiv_pos_as_xyz 
 'x, y, z' 
 '-x, -y, -z' 
  
_cell_length_a                    10.669(2) 
_cell_length_b                    14.186(3) 
_cell_length_c                    16.885(3) 
_cell_angle_alpha                 65.795(4) 
_cell_angle_beta                  85.774(4) 
_cell_angle_gamma                 70.863(4) 
_cell_volume                      2196.5(7) 
_cell_formula_units_Z             2 
_cell_measurement_temperature     173(2) 
_cell_measurement_reflns_used     2006 
_cell_measurement_theta_min       2.24 
_cell_measurement_theta_max       17.50 
  
_exptl_crystal_description        plate 
_exptl_crystal_colour             yellow 
_exptl_crystal_size_max           0.15 
_exptl_crystal_size_mid           0.11 
_exptl_crystal_size_min           0.05 
_exptl_crystal_density_meas       0 
_exptl_crystal_density_diffrn     1.617 
_exptl_crystal_density_method     'not measured' 
_exptl_crystal_F_000              1064 
_exptl_absorpt_coefficient_mu     1.139 
_exptl_absorpt_correction_type    multiscan 
_exptl_absorpt_correction_T_min   0.8451 
_exptl_absorpt_correction_T_max   0.9495 
_exptl_absorpt_process_details    ? 
  
_exptl_special_details 
; 
 ? 
; 
  
_diffrn_ambient_temperature       173(2) 
_diffrn_radiation_wavelength      0.71073 
_diffrn_radiation_type            MoK\a 
_diffrn_radiation_source          'fine-focus sealed tube' 
_diffrn_radiation_monochromator   graphite 
_diffrn_measurement_device_type   'CCD area detector' 
_diffrn_measurement_method        'phi and omega scans' 
_diffrn_detector_area_resol_mean  ? 
_diffrn_standards_number          ? 
_diffrn_standards_interval_count  ? 
_diffrn_standards_interval_time   ? 
_diffrn_standards_decay_%         ? 
_diffrn_reflns_number             21333 
_diffrn_reflns_av_R_equivalents   0.0727 
_diffrn_reflns_av_sigmaI/netI     0.0955 
_diffrn_reflns_limit_h_min        -12 
_diffrn_reflns_limit_h_max        12 
_diffrn_reflns_limit_k_min        -16 
_diffrn_reflns_limit_k_max        16 
_diffrn_reflns_limit_l_min        -20 
_diffrn_reflns_limit_l_max        20 
_diffrn_reflns_theta_min          1.65 
_diffrn_reflns_theta_max          25.11 
_reflns_number_total              7778 
_reflns_number_gt                 4482 
_reflns_threshold_expression      >2sigma(I) 
  
_computing_data_collection        'Bruker SMART' 
_computing_cell_refinement        'Bruker SMINT' 
_computing_data_reduction         'Bruker SAINT' 
_computing_structure_solution     'SHELXS-97 (Sheldrick, 1990)' 
_computing_structure_refinement   'SHELXL-97 (Sheldrick, 1997)' 
_computing_molecular_graphics     'Bruker SHELXTL' 
_computing_publication_material   'Bruker SHELXTL' 
  
_refine_special_details 
; 
 Refinement of F^2^ against ALL reflections.  The weighted R-factor wR and 
 goodness of fit S are based on F^2^, conventional R-factors R are based 
 on F, with F set to zero for negative F^2^. The threshold expression of 
 F^2^ > 2sigma(F^2^) is used only for calculating R-factors(gt) etc. and is 
 not relevant to the choice of reflections for refinement.  R-factors based 
 on F^2^ are statistically about twice as large as those based on F, and R- 
 factors based on ALL data will be even larger. 
; 
  
_refine_ls_structure_factor_coef  Fsqd 
_refine_ls_matrix_type            full 
_refine_ls_weighting_scheme       calc 
_refine_ls_weighting_details 
 'calc w=1/[\s^2^(Fo^2^)+(0.1737P)^2^+2.3213P] where P=(Fo^2^+2Fc^2^)/3' 
_atom_sites_solution_primary      direct 
_atom_sites_solution_secondary    difmap 
_atom_sites_solution_hydrogens    geom 
_refine_ls_hydrogen_treatment     mixed 
_refine_ls_extinction_method      none 
_refine_ls_extinction_coef        ? 
_refine_ls_number_reflns          7778 
_refine_ls_number_parameters      505 
_refine_ls_number_restraints      0 
_refine_ls_R_factor_all           0.1531 
_refine_ls_R_factor_gt            0.0943 
_refine_ls_wR_factor_ref          0.3001 
_refine_ls_wR_factor_gt           0.2578 
_refine_ls_goodness_of_fit_ref    1.022 
_refine_ls_restrained_S_all       1.022 
_refine_ls_shift/su_max           0.008 
_refine_ls_shift/su_mean          0.001 
  
loop_ 
 _atom_site_label 
 _atom_site_type_symbol 
 _atom_site_fract_x 
 _atom_site_fract_y 
 _atom_site_fract_z 
 _atom_site_U_iso_or_equiv 
 _atom_site_adp_type 
 _atom_site_occupancy 
 _atom_site_symmetry_multiplicity 
 _atom_site_calc_flag 
 _atom_site_refinement_flags 
 _atom_site_disorder_assembly 
 _atom_site_disorder_group 
Rh1 Rh 0.94415(8) 0.86277(6) 0.22502(5) 0.0523(3) Uani 1 1 d . . . 
P1 P 0.7995(3) 0.8937(2) 0.31662(15) 0.0536(7) Uani 1 1 d . . . 
P2 P 1.0777(3) 0.7222(2) 0.32911(16) 0.0506(6) Uani 1 1 d . . . 
O1 O 1.1617(19) 0.7677(19) 0.1021(9) 0.284(14) Uani 1 1 d . . . 
H1 H 1.1609 0.7673 0.0525 0.425 Uiso 1 1 calc R . . 
O2 O 0.713(2) 1.0965(17) 0.0819(9) 0.266(12) Uani 1 1 d . . . 
H2 H 0.6603 1.0778 0.1202 0.399 Uiso 1 1 calc R . . 
O3 O 1.2127(7) 0.6811(6) 0.2877(4) 0.0609(18) Uani 1 1 d . . . 
O4 O 1.0404(7) 0.6147(5) 0.3841(4) 0.0583(17) Uani 1 1 d . . . 
O5 O 1.1223(7) 0.7285(5) 0.4141(4) 0.0573(17) Uani 1 1 d . . . 
O6 O 0.6464(7) 0.9405(6) 0.2822(4) 0.067(2) Uani 1 1 d . . . 
O7 O 0.8100(7) 0.7938(6) 0.4076(4) 0.0598(18) Uani 1 1 d . . . 
O8 O 0.7957(7) 0.9836(6) 0.3505(4) 0.0626(18) Uani 1 1 d . . . 
C1 C 1.058(2) 0.8501(15) 0.1051(8) 0.121(8) Uani 1 1 d . . . 
C2 C 1.0642(16) 0.9484(18) 0.1177(8) 0.102(6) Uani 1 1 d . . . 
H2A H 1.1453 0.9538 0.1320 0.122 Uiso 1 1 calc R . . 
C3 C 0.9410(18) 1.0308(11) 0.1065(7) 0.080(4) Uani 1 1 d . . . 
H3 H 0.9334 1.0989 0.1076 0.096 Uiso 1 1 calc R . . 
C4 C 0.8275(17) 1.0043(14) 0.0932(7) 0.092(5) Uani 1 1 d . . . 
C5 C 0.829(2) 0.9167(16) 0.0888(8) 0.100(5) Uani 1 1 d . . . 
H5 H 0.7474 0.9064 0.0828 0.119 Uiso 1 1 calc R . . 
C6 C 0.932(3) 0.8466(17) 0.0920(9) 0.102(5) Uani 1 1 d . . . 
H6 H 0.9268 0.7846 0.0853 0.122 Uiso 1 1 calc R . . 
C7 C 1.1651(10) 0.8096(9) 0.4145(6) 0.057(3) Uani 1 1 d . . . 
C8 C 1.2464(12) 0.8550(11) 0.3541(8) 0.074(3) Uani 1 1 d . . . 
H8 H 1.2748 0.8309 0.3090 0.089 Uiso 1 1 calc R . . 
C9 C 1.2862(14) 0.9351(12) 0.3594(10) 0.091(4) Uani 1 1 d . . . 
H9 H 1.3401 0.9677 0.3168 0.109 Uiso 1 1 calc R . . 
C10 C 1.2486(14) 0.9689(12) 0.4263(10) 0.089(4) Uani 1 1 d . . . 
H10 H 1.2757 1.0251 0.4288 0.107 Uiso 1 1 calc R . . 
C11 C 1.1715(13) 0.9210(11) 0.4897(8) 0.080(3) Uani 1 1 d . . . 
H11 H 1.1486 0.9420 0.5369 0.096 Uiso 1 1 calc R . . 
C12 C 1.1285(11) 0.8425(9) 0.4832(7) 0.066(3) Uani 1 1 d . . . 
H12 H 1.0737 0.8105 0.5254 0.079 Uiso 1 1 calc R . . 
C13 C 1.3151(12) 0.5785(10) 0.3244(10) 0.077(3) Uani 1 1 d . . . 
C14 C 1.3525(13) 0.5241(12) 0.4097(11) 0.100(5) Uani 1 1 d . . . 
H14 H 1.3087 0.5534 0.4497 0.120 Uiso 1 1 calc R . . 
C15 C 1.4580(15) 0.4225(13) 0.4400(15) 0.125(7) Uani 1 1 d . . . 
H15 H 1.4842 0.3798 0.5001 0.150 Uiso 1 1 calc R . . 
C16 C 1.5215(17) 0.3893(16) 0.375(2) 0.161(13) Uani 1 1 d . . . 
H16 H 1.5935 0.3226 0.3906 0.193 Uiso 1 1 calc R . . 
C17 C 1.479(2) 0.453(2) 0.289(2) 0.166(11) Uani 1 1 d . . . 
H17 H 1.5230 0.4310 0.2450 0.199 Uiso 1 1 calc R . . 
C18 C 1.3841(13) 0.5392(13) 0.2672(11) 0.100(5) Uani 1 1 d . . . 
H18 H 1.3577 0.5807 0.2070 0.120 Uiso 1 1 calc R . . 
C19 C 0.9669(10) 0.5739(7) 0.3472(6) 0.055(2) Uani 1 1 d . . . 
C20 C 0.8701(12) 0.5384(9) 0.3980(7) 0.071(3) Uani 1 1 d . . . 
H20 H 0.8534 0.5455 0.4517 0.085 Uiso 1 1 calc R . . 
C21 C 0.7975(14) 0.4917(11) 0.3685(10) 0.090(4) Uani 1 1 d . . . 
H21 H 0.7341 0.4624 0.4034 0.108 Uiso 1 1 calc R . . 
C22 C 0.8191(15) 0.4888(12) 0.2886(10) 0.093(4) Uani 1 1 d . . . 
H22 H 0.7630 0.4654 0.2650 0.112 Uiso 1 1 calc R . . 
C23 C 0.9204(16) 0.5192(12) 0.2423(9) 0.092(4) Uani 1 1 d . . . 
H23 H 0.9418 0.5081 0.1905 0.111 Uiso 1 1 calc R . . 
C24 C 0.9931(12) 0.5672(9) 0.2721(7) 0.070(3) Uani 1 1 d . . . 
H24 H 1.0592 0.5939 0.2385 0.084 Uiso 1 1 calc R . . 
C25 C 0.5902(11) 0.9012(12) 0.2334(8) 0.078(3) Uani 1 1 d . . . 
C26 C 0.4988(13) 0.9819(14) 0.1652(8) 0.096(4) Uani 1 1 d . . . 
H26 H 0.4771 1.0572 0.1531 0.115 Uiso 1 1 calc R . . 
C27 C 0.4416(18) 0.948(2) 0.1162(14) 0.139(8) Uani 1 1 d . . . 
H27 H 0.3813 1.0007 0.0677 0.167 Uiso 1 1 calc R . . 
C28 C 0.472(3) 0.837(3) 0.1379(18) 0.184(13) Uani 1 1 d . . . 
H28 H 0.4278 0.8140 0.1062 0.221 Uiso 1 1 calc R . . 
C29 C 0.562(2) 0.7631(18) 0.2024(18) 0.144(8) Uani 1 1 d . . . 
H29 H 0.5878 0.6880 0.2129 0.173 Uiso 1 1 calc R . . 
C30 C 0.6188(13) 0.7949(12) 0.2545(10) 0.094(4) Uani 1 1 d . . . 
H30 H 0.6767 0.7420 0.3040 0.113 Uiso 1 1 calc R . . 
C31 C 0.7506(10) 0.7944(7) 0.4860(6) 0.051(2) Uani 1 1 d . . . 
C32 C 0.8322(11) 0.7290(9) 0.5592(7) 0.065(3) Uani 1 1 d . . . 
H32 H 0.9225 0.6893 0.5572 0.078 Uiso 1 1 calc R . . 
C33 C 0.7761(13) 0.7233(10) 0.6380(7) 0.075(3) Uani 1 1 d . . . 
H33 H 0.8299 0.6785 0.6909 0.090 Uiso 1 1 calc R . . 
C34 C 0.6489(13) 0.7790(10) 0.6408(8) 0.076(3) Uani 1 1 d . . . 
H34 H 0.6129 0.7719 0.6953 0.091 Uiso 1 1 calc R . . 
C35 C 0.5694(12) 0.8474(10) 0.5642(8) 0.072(3) Uani 1 1 d . . . 
H35 H 0.4800 0.8897 0.5653 0.087 Uiso 1 1 calc R . . 
C36 C 0.6238(10) 0.8523(9) 0.4856(7) 0.059(3) Uani 1 1 d . . . 
H36 H 0.5709 0.8966 0.4323 0.071 Uiso 1 1 calc R . . 
C37 C 0.8053(13) 1.0864(8) 0.2940(7) 0.063(3) Uani 1 1 d . . . 
C38 C 0.9250(16) 1.1024(11) 0.2926(8) 0.088(4) Uani 1 1 d . . . 
H38 H 0.9996 1.0434 0.3269 0.106 Uiso 1 1 calc R . . 
C39 C 0.939(2) 1.2013(15) 0.2430(11) 0.126(7) Uani 1 1 d . . . 
H39 H 1.0224 1.2121 0.2444 0.151 Uiso 1 1 calc R . . 
C40 C 0.838(3) 1.2812(17) 0.1934(13) 0.137(9) Uani 1 1 d . . . 
H40 H 0.8496 1.3488 0.1564 0.165 Uiso 1 1 calc R . . 
C41 C 0.716(3) 1.2702(12) 0.1934(10) 0.125(7) Uani 1 1 d . . . 
H41 H 0.6425 1.3313 0.1593 0.149 Uiso 1 1 calc R . . 
C42 C 0.6964(15) 1.1663(10) 0.2448(8) 0.086(4) Uani 1 1 d . . . 
H42 H 0.6137 1.1549 0.2441 0.104 Uiso 1 1 calc R . . 
Sb1 Sb 0.3114(9) 0.3740(6) 0.0424(3) 0.292(4) Uani 0.492(7) 1 d PG A 1 
F1 F 0.395(3) 0.425(2) -0.0519(14) 0.300 Uiso 0.492(7) 1 d PG A 1 
F2 F 0.264(3) 0.2955(19) -0.0001(16) 0.300 Uiso 0.492(7) 1 d PG A 1 
F3 F 0.458(2) 0.2662(19) 0.0926(17) 0.300 Uiso 0.492(7) 1 d PG A 1 
F4 F 0.229(3) 0.325(2) 0.1371(14) 0.300 Uiso 0.492(7) 1 d PG A 1 
F5 F 0.357(3) 0.456(2) 0.0829(16) 0.300 Uiso 0.492(7) 1 d PG A 1 
F6 F 0.165(2) 0.4839(19) -0.0072(17) 0.300 Uiso 0.492(7) 1 d PG A 1 
Sb1 Sb 0.2388(4) 0.3130(3) 0.05852(19) 0.1314(17) Uani 0.508(7) 1 d PG A 2 
F1 F 0.340(2) 0.240(2) -0.0029(16) 0.300 Uiso 0.508(7) 1 d PG A 2 
F2 F 0.221(2) 0.1867(19) 0.1391(15) 0.300 Uiso 0.508(7) 1 d PG A 2 
F3 F 0.387(2) 0.292(2) 0.1179(14) 0.300 Uiso 0.508(7) 1 d PG A 2 
F4 F 0.138(2) 0.3882(19) 0.1184(16) 0.300 Uiso 0.508(7) 1 d PG A 2 
F5 F 0.255(2) 0.4396(19) -0.0247(15) 0.300 Uiso 0.508(7) 1 d PG A 2 
F6 F 0.090(2) 0.337(2) -0.0028(14) 0.300 Uiso 0.508(7) 1 d PG A 2 
  
loop_ 
 _atom_site_aniso_label 
 _atom_site_aniso_U_11 
 _atom_site_aniso_U_22 
 _atom_site_aniso_U_33 
 _atom_site_aniso_U_23 
 _atom_site_aniso_U_13 
 _atom_site_aniso_U_12 
Rh1 0.0676(6) 0.0519(5) 0.0308(4) -0.0124(3) 0.0048(3) -0.0173(4) 
P1 0.0617(17) 0.0549(15) 0.0360(13) -0.0133(11) 0.0016(11) -0.0153(13) 
P2 0.0601(16) 0.0497(14) 0.0389(13) -0.0155(11) 0.0027(11) -0.0175(12) 
O1 0.227(18) 0.32(2) 0.099(11) -0.039(13) 0.047(11) 0.096(17) 
O2 0.27(2) 0.25(2) 0.091(10) -0.013(11) 0.011(12) 0.075(17) 
O3 0.061(4) 0.058(4) 0.057(4) -0.023(3) 0.012(3) -0.013(4) 
O4 0.070(5) 0.051(4) 0.049(4) -0.010(3) -0.003(3) -0.026(3) 
O5 0.073(5) 0.060(4) 0.043(4) -0.019(3) 0.000(3) -0.028(4) 
O6 0.065(5) 0.068(5) 0.050(4) -0.018(4) -0.005(3) -0.005(4) 
O7 0.058(4) 0.065(4) 0.041(4) -0.016(3) 0.011(3) -0.012(3) 
O8 0.082(5) 0.060(4) 0.046(4) -0.022(3) 0.010(3) -0.024(4) 
C1 0.115(14) 0.109(12) 0.039(7) 0.006(7) 0.038(8) 0.033(11) 
C2 0.085(10) 0.174(18) 0.039(6) -0.016(9) 0.006(6) -0.067(12) 
C3 0.124(12) 0.077(8) 0.040(6) -0.018(6) 0.022(7) -0.045(9) 
C4 0.113(12) 0.088(10) 0.031(6) -0.006(6) 0.015(6) -0.003(10) 
C5 0.146(17) 0.093(12) 0.046(7) -0.021(8) 0.006(8) -0.033(12) 
C6 0.154(18) 0.105(13) 0.056(8) -0.036(8) 0.028(10) -0.054(13) 
C7 0.055(6) 0.066(7) 0.051(6) -0.026(5) -0.003(5) -0.015(5) 
C8 0.071(8) 0.099(9) 0.078(8) -0.057(7) 0.024(6) -0.035(7) 
C9 0.091(10) 0.107(10) 0.101(10) -0.044(9) 0.011(8) -0.066(9) 
C10 0.093(10) 0.095(10) 0.095(10) -0.048(8) -0.017(8) -0.033(8) 
C11 0.086(9) 0.093(9) 0.069(8) -0.040(7) -0.001(7) -0.028(8) 
C12 0.070(7) 0.076(7) 0.051(6) -0.025(6) 0.007(5) -0.024(6) 
C13 0.066(8) 0.065(8) 0.098(10) -0.033(7) 0.003(7) -0.022(6) 
C14 0.064(8) 0.080(9) 0.125(13) -0.025(9) 0.006(8) -0.008(7) 
C15 0.070(10) 0.070(10) 0.193(19) -0.014(11) -0.043(11) -0.011(8) 
C16 0.054(10) 0.085(13) 0.39(4) -0.15(2) -0.004(17) -0.009(9) 
C17 0.093(15) 0.16(2) 0.28(4) -0.15(2) -0.014(18) 0.005(15) 
C18 0.063(8) 0.116(12) 0.131(13) -0.084(11) 0.000(8) 0.003(8) 
C19 0.067(7) 0.040(5) 0.052(6) -0.009(4) -0.008(5) -0.020(5) 
C20 0.090(8) 0.069(7) 0.051(6) -0.017(5) 0.010(6) -0.033(7) 
C21 0.091(10) 0.084(9) 0.107(11) -0.040(8) 0.013(8) -0.045(8) 
C22 0.105(11) 0.118(12) 0.096(10) -0.061(9) 0.012(9) -0.064(10) 
C23 0.128(12) 0.099(10) 0.075(9) -0.052(8) 0.008(8) -0.048(9) 
C24 0.092(9) 0.071(7) 0.054(7) -0.026(6) 0.015(6) -0.037(7) 
C25 0.057(7) 0.099(10) 0.074(8) -0.033(7) -0.010(6) -0.019(7) 
C26 0.074(9) 0.129(12) 0.063(8) -0.018(8) -0.021(7) -0.030(8) 
C27 0.080(12) 0.22(3) 0.112(14) -0.061(17) -0.016(10) -0.044(15) 
C28 0.16(2) 0.33(4) 0.16(2) -0.14(3) 0.023(19) -0.16(3) 
C29 0.109(14) 0.128(16) 0.22(2) -0.101(17) -0.022(16) -0.031(12) 
C30 0.072(9) 0.088(10) 0.113(11) -0.031(9) -0.020(8) -0.021(8) 
C31 0.053(6) 0.044(5) 0.046(5) -0.007(4) 0.001(4) -0.019(5) 
C32 0.059(7) 0.077(7) 0.052(6) -0.025(6) 0.009(5) -0.018(6) 
C33 0.089(9) 0.085(8) 0.043(6) -0.016(6) -0.002(6) -0.031(7) 
C34 0.077(8) 0.087(8) 0.060(7) -0.031(7) 0.032(6) -0.029(7) 
C35 0.061(7) 0.085(8) 0.071(8) -0.032(7) 0.022(6) -0.026(6) 
C36 0.051(6) 0.065(6) 0.050(6) -0.020(5) 0.008(5) -0.012(5) 
C37 0.089(8) 0.050(6) 0.046(6) -0.020(5) 0.015(6) -0.018(6) 
C38 0.112(11) 0.080(9) 0.075(8) -0.024(7) 0.003(8) -0.043(8) 
C39 0.20(2) 0.099(13) 0.099(12) -0.031(11) 0.035(13) -0.092(15) 
C40 0.27(3) 0.079(12) 0.085(12) -0.027(10) 0.035(16) -0.093(18) 
C41 0.21(2) 0.055(9) 0.066(9) -0.018(7) -0.015(12) 0.009(11) 
C42 0.111(11) 0.066(8) 0.065(8) -0.029(7) 0.015(7) -0.007(8) 
Sb1 0.380(9) 0.194(5) 0.158(4) 0.050(4) -0.127(5) -0.043(6) 
Sb1 0.152(3) 0.117(3) 0.0819(17) -0.0411(16) -0.0110(16) 0.0148(18) 
  
_geom_special_details 
; 
 All esds (except the esd in the dihedral angle between two l.s. planes) 
 are estimated using the full covariance matrix.  The cell esds are taken 
 into account individually in the estimation of esds in distances, angles 
 and torsion angles; correlations between esds in cell parameters are only 
 used when they are defined by crystal symmetry.  An approximate (isotropic) 
 treatment of cell esds is used for estimating esds involving l.s. planes. 
; 
  
loop_ 
 _geom_bond_atom_site_label_1 
 _geom_bond_atom_site_label_2 
 _geom_bond_distance 
 _geom_bond_site_symmetry_2 
 _geom_bond_publ_flag 
Rh1 P1 2.174(3) . ? 
Rh1 P2 2.175(3) . ? 
Rh1 C2 2.297(12) . ? 
Rh1 C1 2.323(12) . ? 
Rh1 C6 2.366(14) . ? 
Rh1 C4 2.374(12) . ? 
Rh1 C5 2.395(15) . ? 
Rh1 C3 2.395(11) . ? 
P1 O7 1.586(7) . ? 
P1 O8 1.587(7) . ? 
P1 O6 1.599(8) . ? 
P2 O4 1.589(7) . ? 
P2 O5 1.590(7) . ? 
P2 O3 1.593(7) . ? 
O1 C1 1.34(2) . ? 
O2 C4 1.42(2) . ? 
O3 C13 1.419(14) . ? 
O4 C19 1.416(11) . ? 
O5 C7 1.372(12) . ? 
O6 C25 1.421(14) . ? 
O7 C31 1.427(11) . ? 
O8 C37 1.411(12) . ? 
C1 C6 1.40(3) . ? 
C1 C2 1.52(3) . ? 
C2 C3 1.41(2) . ? 
C3 C4 1.44(2) . ? 
C4 C5 1.27(2) . ? 
C5 C6 1.20(2) . ? 
C7 C8 1.380(15) . ? 
C7 C12 1.404(14) . ? 
C8 C9 1.373(16) . ? 
C9 C10 1.384(19) . ? 
C10 C11 1.387(18) . ? 
C11 C12 1.381(16) . ? 
C13 C14 1.342(19) . ? 
C13 C18 1.360(18) . ? 
C14 C15 1.42(2) . ? 
C15 C16 1.41(3) . ? 
C16 C17 1.38(4) . ? 
C17 C18 1.24(3) . ? 
C19 C24 1.313(14) . ? 
C19 C20 1.383(15) . ? 
C20 C21 1.396(16) . ? 
C21 C22 1.367(19) . ? 
C22 C23 1.367(18) . ? 
C23 C24 1.415(16) . ? 
C25 C30 1.330(18) . ? 
C25 C26 1.393(17) . ? 
C26 C27 1.37(3) . ? 
C27 C28 1.39(3) . ? 
C28 C29 1.33(3) . ? 
C29 C30 1.39(2) . ? 
C31 C36 1.332(13) . ? 
C31 C32 1.355(14) . ? 
C32 C33 1.400(15) . ? 
C33 C34 1.336(16) . ? 
C34 C35 1.389(17) . ? 
C35 C36 1.392(14) . ? 
C37 C42 1.353(17) . ? 
C37 C38 1.365(17) . ? 
C38 C39 1.360(19) . ? 
C39 C40 1.31(3) . ? 
C40 C41 1.36(3) . ? 
C41 C42 1.45(2) . ? 
Sb1 F3 1.75(2) . ? 
Sb1 F2 1.756(19) . ? 
Sb1 F4 1.757(19) . ? 
Sb1 F6 1.76(2) . ? 
Sb1 F1 1.76(2) . ? 
Sb1 F5 1.77(2) . ? 
Sb1 F3 1.81(2) . ? 
Sb1 F2 1.81(2) . ? 
Sb1 F4 1.81(2) . ? 
Sb1 F6 1.82(2) . ? 
Sb1 F1 1.82(2) . ? 
Sb1 F5 1.82(2) . ? 
  
loop_ 
 _geom_angle_atom_site_label_1 
 _geom_angle_atom_site_label_2 
 _geom_angle_atom_site_label_3 
 _geom_angle 
 _geom_angle_site_symmetry_1 
 _geom_angle_site_symmetry_3 
 _geom_angle_publ_flag 
P1 Rh1 P2 91.55(10) . . ? 
P1 Rh1 C2 141.0(6) . . ? 
P2 Rh1 C2 110.1(5) . . ? 
P1 Rh1 C1 167.2(5) . . ? 
P2 Rh1 C1 100.0(4) . . ? 
C2 Rh1 C1 38.4(6) . . ? 
P1 Rh1 C6 134.1(6) . . ? 
P2 Rh1 C6 116.3(6) . . ? 
C2 Rh1 C6 64.6(6) . . ? 
C1 Rh1 C6 34.7(6) . . ? 
P1 Rh1 C4 99.5(3) . . ? 
P2 Rh1 C4 168.8(4) . . ? 
C2 Rh1 C4 61.7(5) . . ? 
C1 Rh1 C4 68.8(5) . . ? 
C6 Rh1 C4 54.1(6) . . ? 
P1 Rh1 C5 109.0(5) . . ? 
P2 Rh1 C5 142.3(5) . . ? 
C2 Rh1 C5 73.2(5) . . ? 
C1 Rh1 C5 58.3(7) . . ? 
C6 Rh1 C5 29.2(5) . . ? 
C4 Rh1 C5 30.9(5) . . ? 
P1 Rh1 C3 110.6(4) . . ? 
P2 Rh1 C3 141.0(4) . . ? 
C2 Rh1 C3 34.8(6) . . ? 
C1 Rh1 C3 63.0(5) . . ? 
C6 Rh1 C3 70.7(5) . . ? 
C4 Rh1 C3 35.1(5) . . ? 
C5 Rh1 C3 60.6(5) . . ? 
O7 P1 O8 99.1(4) . . ? 
O7 P1 O6 105.3(4) . . ? 
O8 P1 O6 97.4(4) . . ? 
O7 P1 Rh1 116.3(3) . . ? 
O8 P1 Rh1 119.4(3) . . ? 
O6 P1 Rh1 116.3(3) . . ? 
O4 P2 O5 92.6(4) . . ? 
O4 P2 O3 104.7(4) . . ? 
O5 P2 O3 105.1(4) . . ? 
O4 P2 Rh1 122.2(3) . . ? 
O5 P2 Rh1 122.4(3) . . ? 
O3 P2 Rh1 107.4(3) . . ? 
C13 O3 P2 127.4(7) . . ? 
C19 O4 P2 122.8(6) . . ? 
C7 O5 P2 125.0(6) . . ? 
C25 O6 P1 124.5(7) . . ? 
C31 O7 P1 128.9(6) . . ? 
C37 O8 P1 122.0(6) . . ? 
O1 C1 C6 116(3) . . ? 
O1 C1 C2 126(3) . . ? 
C6 C1 C2 117.4(14) . . ? 
O1 C1 Rh1 128.4(10) . . ? 
C6 C1 Rh1 74.3(8) . . ? 
C2 C1 Rh1 69.9(7) . . ? 
C3 C2 C1 114.9(13) . . ? 
C3 C2 Rh1 76.4(7) . . ? 
C1 C2 Rh1 71.8(7) . . ? 
C2 C3 C4 114.9(13) . . ? 
C2 C3 Rh1 68.8(7) . . ? 
C4 C3 Rh1 71.7(7) . . ? 
C5 C4 O2 126(2) . . ? 
C5 C4 C3 126.5(16) . . ? 
O2 C4 C3 107.3(19) . . ? 
C5 C4 Rh1 75.4(9) . . ? 
O2 C4 Rh1 128.4(9) . . ? 
C3 C4 Rh1 73.2(7) . . ? 
C6 C5 C4 122(2) . . ? 
C6 C5 Rh1 74.1(11) . . ? 
C4 C5 Rh1 73.7(9) . . ? 
C5 C6 C1 124.4(19) . . ? 
C5 C6 Rh1 76.8(11) . . ? 
C1 C6 Rh1 71.0(8) . . ? 
O5 C7 C8 123.3(10) . . ? 
O5 C7 C12 117.0(9) . . ? 
C8 C7 C12 119.5(10) . . ? 
C9 C8 C7 119.9(11) . . ? 
C8 C9 C10 120.6(13) . . ? 
C9 C10 C11 120.3(13) . . ? 
C12 C11 C10 119.1(12) . . ? 
C11 C12 C7 120.4(11) . . ? 
C14 C13 C18 119.6(14) . . ? 
C14 C13 O3 123.9(12) . . ? 
C18 C13 O3 116.4(13) . . ? 
C13 C14 C15 119.7(17) . . ? 
C16 C15 C14 115.6(19) . . ? 
C17 C16 C15 120.1(18) . . ? 
C18 C17 C16 121(3) . . ? 
C17 C18 C13 124(2) . . ? 
C24 C19 C20 123.5(10) . . ? 
C24 C19 O4 121.9(10) . . ? 
C20 C19 O4 114.6(9) . . ? 
C19 C20 C21 118.3(11) . . ? 
C22 C21 C20 119.0(12) . . ? 
C21 C22 C23 120.8(13) . . ? 
C22 C23 C24 119.6(12) . . ? 
C19 C24 C23 118.3(11) . . ? 
C30 C25 C26 123.0(13) . . ? 
C30 C25 O6 121.9(11) . . ? 
C26 C25 O6 115.0(13) . . ? 
C27 C26 C25 117.3(17) . . ? 
C26 C27 C28 120(2) . . ? 
C29 C28 C27 121(2) . . ? 
C28 C29 C30 120(2) . . ? 
C25 C30 C29 118.5(15) . . ? 
C36 C31 C32 123.9(10) . . ? 
C36 C31 O7 121.6(8) . . ? 
C32 C31 O7 114.5(9) . . ? 
C31 C32 C33 116.3(11) . . ? 
C34 C33 C32 121.8(11) . . ? 
C33 C34 C35 120.1(10) . . ? 
C34 C35 C36 118.4(11) . . ? 
C31 C36 C35 119.4(10) . . ? 
C42 C37 C38 122.2(12) . . ? 
C42 C37 O8 119.6(12) . . ? 
C38 C37 O8 118.2(11) . . ? 
C39 C38 C37 121.2(16) . . ? 
C40 C39 C38 119(2) . . ? 
C39 C40 C41 121.9(18) . . ? 
C40 C41 C42 120.4(16) . . ? 
C37 C42 C41 114.9(15) . . ? 
F3 Sb1 F2 91.2 . . ? 
F3 Sb1 F4 89.7 . . ? 
F2 Sb1 F4 90.6 . . ? 
F3 Sb1 F6 178.9 . . ? 
F2 Sb1 F6 89.9 . . ? 
F4 Sb1 F6 90.2 . . ? 
F3 Sb1 F1 90.2 . . ? 
F2 Sb1 F1 90.3 . . ? 
F4 Sb1 F1 179.0 . . ? 
F6 Sb1 F1 89.8 . . ? 
F3 Sb1 F5 90.0 . . ? 
F2 Sb1 F5 178.6 . . ? 
F4 Sb1 F5 90.1 . . ? 
F6 Sb1 F5 88.9 . . ? 
F1 Sb1 F5 88.9 . . ? 
F3 Sb1 F2 91.2 . . ? 
F3 Sb1 F4 89.7 . . ? 
F2 Sb1 F4 90.6 . . ? 
F3 Sb1 F6 178.9 . . ? 
F2 Sb1 F6 89.9 . . ? 
F4 Sb1 F6 90.2 . . ? 
F3 Sb1 F1 90.2 . . ? 
F2 Sb1 F1 90.3 . . ? 
F4 Sb1 F1 179.0 . . ? 
F6 Sb1 F1 89.8 . . ? 
F3 Sb1 F5 90.0 . . ? 
F2 Sb1 F5 178.6 . . ? 
F4 Sb1 F5 90.1 . . ? 
F6 Sb1 F5 88.9 . . ? 
F1 Sb1 F5 88.9 . . ? 
  
loop_ 
 _geom_torsion_atom_site_label_1 
 _geom_torsion_atom_site_label_2 
 _geom_torsion_atom_site_label_3 
 _geom_torsion_atom_site_label_4 
 _geom_torsion 
 _geom_torsion_site_symmetry_1 
 _geom_torsion_site_symmetry_2 
 _geom_torsion_site_symmetry_3 
 _geom_torsion_site_symmetry_4 
 _geom_torsion_publ_flag 
P2 Rh1 P1 O7 -20.7(3) . . . . ? 
C2 Rh1 P1 O7 -146.2(6) . . . . ? 
C1 Rh1 P1 O7 134(3) . . . . ? 
C6 Rh1 P1 O7 109.4(7) . . . . ? 
C4 Rh1 P1 O7 157.6(6) . . . . ? 
C5 Rh1 P1 O7 127.2(6) . . . . ? 
C3 Rh1 P1 O7 -167.9(5) . . . . ? 
P2 Rh1 P1 O8 98.1(3) . . . . ? 
C2 Rh1 P1 O8 -27.5(6) . . . . ? 
C1 Rh1 P1 O8 -107(3) . . . . ? 
C6 Rh1 P1 O8 -131.9(7) . . . . ? 
C4 Rh1 P1 O8 -83.6(6) . . . . ? 
C5 Rh1 P1 O8 -114.0(6) . . . . ? 
C3 Rh1 P1 O8 -49.1(5) . . . . ? 
P2 Rh1 P1 O6 -145.6(3) . . . . ? 
C2 Rh1 P1 O6 88.9(6) . . . . ? 
C1 Rh1 P1 O6 10(3) . . . . ? 
C6 Rh1 P1 O6 -15.5(7) . . . . ? 
C4 Rh1 P1 O6 32.7(6) . . . . ? 
C5 Rh1 P1 O6 2.3(6) . . . . ? 
C3 Rh1 P1 O6 67.2(5) . . . . ? 
P1 Rh1 P2 O4 65.9(3) . . . . ? 
C2 Rh1 P2 O4 -147.2(7) . . . . ? 
C1 Rh1 P2 O4 -108.7(8) . . . . ? 
C6 Rh1 P2 O4 -76.3(6) . . . . ? 
C4 Rh1 P2 O4 -105(3) . . . . ? 
C5 Rh1 P2 O4 -58.9(8) . . . . ? 
C3 Rh1 P2 O4 -167.8(6) . . . . ? 
P1 Rh1 P2 O5 -51.8(3) . . . . ? 
C2 Rh1 P2 O5 95.2(6) . . . . ? 
C1 Rh1 P2 O5 133.6(8) . . . . ? 
C6 Rh1 P2 O5 166.0(6) . . . . ? 
C4 Rh1 P2 O5 137(3) . . . . ? 
C5 Rh1 P2 O5 -176.5(8) . . . . ? 
C3 Rh1 P2 O5 74.5(6) . . . . ? 
P1 Rh1 P2 O3 -173.3(3) . . . . ? 
C2 Rh1 P2 O3 -26.3(6) . . . . ? 
C1 Rh1 P2 O3 12.1(8) . . . . ? 
C6 Rh1 P2 O3 44.5(6) . . . . ? 
C4 Rh1 P2 O3 15(3) . . . . ? 
C5 Rh1 P2 O3 62.0(8) . . . . ? 
C3 Rh1 P2 O3 -46.9(6) . . . . ? 
O4 P2 O3 C13 -32.2(9) . . . . ? 
O5 P2 O3 C13 64.7(9) . . . . ? 
Rh1 P2 O3 C13 -163.5(8) . . . . ? 
O5 P2 O4 C19 167.4(8) . . . . ? 
O3 P2 O4 C19 -86.3(8) . . . . ? 
Rh1 P2 O4 C19 35.8(8) . . . . ? 
O4 P2 O5 C7 -177.7(8) . . . . ? 
O3 P2 O5 C7 76.3(8) . . . . ? 
Rh1 P2 O5 C7 -46.3(9) . . . . ? 
O7 P1 O6 C25 -86.7(9) . . . . ? 
O8 P1 O6 C25 171.7(9) . . . . ? 
Rh1 P1 O6 C25 43.7(9) . . . . ? 
O8 P1 O7 C31 35.6(9) . . . . ? 
O6 P1 O7 C31 -64.7(9) . . . . ? 
Rh1 P1 O7 C31 165.0(7) . . . . ? 
O7 P1 O8 C37 170.9(8) . . . . ? 
O6 P1 O8 C37 -82.3(9) . . . . ? 
Rh1 P1 O8 C37 43.6(9) . . . . ? 
P1 Rh1 C1 O1 -144.0(18) . . . . ? 
P2 Rh1 C1 O1 11(3) . . . . ? 
C2 Rh1 C1 O1 121(3) . . . . ? 
C6 Rh1 C1 O1 -112(4) . . . . ? 
C4 Rh1 C1 O1 -169(3) . . . . ? 
C5 Rh1 C1 O1 -136(3) . . . . ? 
C3 Rh1 C1 O1 153(3) . . . . ? 
P1 Rh1 C1 C6 -32(4) . . . . ? 
P2 Rh1 C1 C6 122.4(11) . . . . ? 
C2 Rh1 C1 C6 -127.7(13) . . . . ? 
C4 Rh1 C1 C6 -56.9(11) . . . . ? 
C5 Rh1 C1 C6 -24.3(10) . . . . ? 
C3 Rh1 C1 C6 -94.9(11) . . . . ? 
P1 Rh1 C1 C2 95(3) . . . . ? 
P2 Rh1 C1 C2 -109.9(9) . . . . ? 
C6 Rh1 C1 C2 127.7(13) . . . . ? 
C4 Rh1 C1 C2 70.8(9) . . . . ? 
C5 Rh1 C1 C2 103.4(9) . . . . ? 
C3 Rh1 C1 C2 32.8(8) . . . . ? 
O1 C1 C2 C3 171.6(12) . . . . ? 
C6 C1 C2 C3 -5.8(16) . . . . ? 
Rh1 C1 C2 C3 -64.8(9) . . . . ? 
O1 C1 C2 Rh1 -123.5(14) . . . . ? 
C6 C1 C2 Rh1 59.1(10) . . . . ? 
P1 Rh1 C2 C3 -37.2(11) . . . . ? 
P2 Rh1 C2 C3 -157.1(8) . . . . ? 
C1 Rh1 C2 C3 122.3(12) . . . . ? 
C6 Rh1 C2 C3 92.5(10) . . . . ? 
C4 Rh1 C2 C3 31.3(8) . . . . ? 
C5 Rh1 C2 C3 62.5(9) . . . . ? 
P1 Rh1 C2 C1 -159.5(9) . . . . ? 
P2 Rh1 C2 C1 80.5(9) . . . . ? 
C6 Rh1 C2 C1 -29.9(9) . . . . ? 
C4 Rh1 C2 C1 -91.0(10) . . . . ? 
C5 Rh1 C2 C1 -59.8(9) . . . . ? 
C3 Rh1 C2 C1 -122.3(12) . . . . ? 
C1 C2 C3 C4 5.7(15) . . . . ? 
Rh1 C2 C3 C4 -56.5(9) . . . . ? 
C1 C2 C3 Rh1 62.2(9) . . . . ? 
P1 Rh1 C3 C2 156.0(9) . . . . ? 
P2 Rh1 C3 C2 35.4(11) . . . . ? 
C1 Rh1 C3 C2 -36.1(9) . . . . ? 
C6 Rh1 C3 C2 -73.0(10) . . . . ? 
C4 Rh1 C3 C2 -127.2(13) . . . . ? 
C5 Rh1 C3 C2 -103.1(11) . . . . ? 
P1 Rh1 C3 C4 -76.7(8) . . . . ? 
P2 Rh1 C3 C4 162.6(7) . . . . ? 
C2 Rh1 C3 C4 127.2(13) . . . . ? 
C1 Rh1 C3 C4 91.2(10) . . . . ? 
C6 Rh1 C3 C4 54.3(9) . . . . ? 
C5 Rh1 C3 C4 24.1(8) . . . . ? 
C2 C3 C4 C5 -1.8(18) . . . . ? 
Rh1 C3 C4 C5 -56.7(12) . . . . ? 
C2 C3 C4 O2 -179.2(11) . . . . ? 
Rh1 C3 C4 O2 125.9(10) . . . . ? 
C2 C3 C4 Rh1 54.9(9) . . . . ? 
P1 Rh1 C4 C5 -111.4(12) . . . . ? 
P2 Rh1 C4 C5 60(3) . . . . ? 
C2 Rh1 C4 C5 105.0(13) . . . . ? 
C1 Rh1 C4 C5 63.2(12) . . . . ? 
C6 Rh1 C4 C5 27.2(11) . . . . ? 
C3 Rh1 C4 C5 136.0(15) . . . . ? 
P1 Rh1 C4 O2 13(2) . . . . ? 
P2 Rh1 C4 O2 -175.5(19) . . . . ? 
C2 Rh1 C4 O2 -130(2) . . . . ? 
C1 Rh1 C4 O2 -172(3) . . . . ? 
C6 Rh1 C4 O2 152(3) . . . . ? 
C5 Rh1 C4 O2 125(3) . . . . ? 
C3 Rh1 C4 O2 -99(2) . . . . ? 
P1 Rh1 C4 C3 112.5(8) . . . . ? 
P2 Rh1 C4 C3 -76(3) . . . . ? 
C2 Rh1 C4 C3 -31.1(8) . . . . ? 
C1 Rh1 C4 C3 -72.8(10) . . . . ? 
C6 Rh1 C4 C3 -108.9(10) . . . . ? 
C5 Rh1 C4 C3 -136.0(15) . . . . ? 
O2 C4 C5 C6 173.7(14) . . . . ? 
C3 C4 C5 C6 -3(2) . . . . ? 
Rh1 C4 C5 C6 -59.0(14) . . . . ? 
O2 C4 C5 Rh1 -127.3(13) . . . . ? 
C3 C4 C5 Rh1 55.8(12) . . . . ? 
P1 Rh1 C5 C6 -153.1(11) . . . . ? 
P2 Rh1 C5 C6 -33.5(16) . . . . ? 
C2 Rh1 C5 C6 67.9(13) . . . . ? 
C1 Rh1 C5 C6 28.8(12) . . . . ? 
C4 Rh1 C5 C6 130.6(19) . . . . ? 
C3 Rh1 C5 C6 103.4(13) . . . . ? 
P1 Rh1 C5 C4 76.3(12) . . . . ? 
P2 Rh1 C5 C4 -164.1(8) . . . . ? 
C2 Rh1 C5 C4 -62.8(12) . . . . ? 
C1 Rh1 C5 C4 -101.9(13) . . . . ? 
C6 Rh1 C5 C4 -130.6(19) . . . . ? 
C3 Rh1 C5 C4 -27.2(10) . . . . ? 
C4 C5 C6 C1 3(2) . . . . ? 
Rh1 C5 C6 C1 -55.5(14) . . . . ? 
C4 C5 C6 Rh1 58.8(13) . . . . ? 
O1 C1 C6 C5 -176.4(15) . . . . ? 
C2 C1 C6 C5 1(2) . . . . ? 
Rh1 C1 C6 C5 58.0(15) . . . . ? 
O1 C1 C6 Rh1 125.6(12) . . . . ? 
C2 C1 C6 Rh1 -56.8(10) . . . . ? 
P1 Rh1 C6 C5 36.5(14) . . . . ? 
P2 Rh1 C6 C5 157.9(11) . . . . ? 
C2 Rh1 C6 C5 -101.1(13) . . . . ? 
C1 Rh1 C6 C5 -134.0(18) . . . . ? 
C4 Rh1 C6 C5 -28.8(12) . . . . ? 
C3 Rh1 C6 C5 -63.9(12) . . . . ? 
P1 Rh1 C6 C1 170.5(9) . . . . ? 
P2 Rh1 C6 C1 -68.1(11) . . . . ? 
C2 Rh1 C6 C1 32.9(10) . . . . ? 
C4 Rh1 C6 C1 105.2(12) . . . . ? 
C5 Rh1 C6 C1 134.0(18) . . . . ? 
C3 Rh1 C6 C1 70.1(11) . . . . ? 
P2 O5 C7 C8 -39.5(14) . . . . ? 
P2 O5 C7 C12 143.8(8) . . . . ? 
O5 C7 C8 C9 -179.3(11) . . . . ? 
C12 C7 C8 C9 -2.8(18) . . . . ? 
C7 C8 C9 C10 2(2) . . . . ? 
C8 C9 C10 C11 1(2) . . . . ? 
C9 C10 C11 C12 -3(2) . . . . ? 
C10 C11 C12 C7 1.6(18) . . . . ? 
O5 C7 C12 C11 177.8(10) . . . . ? 
C8 C7 C12 C11 1.1(17) . . . . ? 
P2 O3 C13 C14 -36.3(16) . . . . ? 
P2 O3 C13 C18 148.9(10) . . . . ? 
C18 C13 C14 C15 -4(2) . . . . ? 
O3 C13 C14 C15 -178.9(11) . . . . ? 
C13 C14 C15 C16 3(2) . . . . ? 
C14 C15 C16 C17 -1(3) . . . . ? 
C15 C16 C17 C18 -1(3) . . . . ? 
C16 C17 C18 C13 0(3) . . . . ? 
C14 C13 C18 C17 2(3) . . . . ? 
O3 C13 C18 C17 177.4(17) . . . . ? 
P2 O4 C19 C24 44.9(13) . . . . ? 
P2 O4 C19 C20 -137.4(8) . . . . ? 
C24 C19 C20 C21 0.8(18) . . . . ? 
O4 C19 C20 C21 -176.8(10) . . . . ? 
C19 C20 C21 C22 -3.9(19) . . . . ? 
C20 C21 C22 C23 8(2) . . . . ? 
C21 C22 C23 C24 -8(2) . . . . ? 
C20 C19 C24 C23 -1.3(18) . . . . ? 
O4 C19 C24 C23 176.2(10) . . . . ? 
C22 C23 C24 C19 5(2) . . . . ? 
P1 O6 C25 C30 44.0(16) . . . . ? 
P1 O6 C25 C26 -139.1(9) . . . . ? 
C30 C25 C26 C27 -3(2) . . . . ? 
O6 C25 C26 C27 -179.9(13) . . . . ? 
C25 C26 C27 C28 2(3) . . . . ? 
C26 C27 C28 C29 -4(4) . . . . ? 
C27 C28 C29 C30 6(4) . . . . ? 
C26 C25 C30 C29 5(2) . . . . ? 
O6 C25 C30 C29 -178.6(14) . . . . ? 
C28 C29 C30 C25 -6(3) . . . . ? 
P1 O7 C31 C36 44.8(13) . . . . ? 
P1 O7 C31 C32 -137.4(8) . . . . ? 
C36 C31 C32 C33 0.6(16) . . . . ? 
O7 C31 C32 C33 -177.1(9) . . . . ? 
C31 C32 C33 C34 0.1(18) . . . . ? 
C32 C33 C34 C35 -2(2) . . . . ? 
C33 C34 C35 C36 2.7(19) . . . . ? 
C32 C31 C36 C35 0.4(17) . . . . ? 
O7 C31 C36 C35 177.9(9) . . . . ? 
C34 C35 C36 C31 -2.0(17) . . . . ? 
P1 O8 C37 C42 80.4(11) . . . . ? 
P1 O8 C37 C38 -101.0(11) . . . . ? 
C42 C37 C38 C39 2(2) . . . . ? 
O8 C37 C38 C39 -176.7(12) . . . . ? 
C37 C38 C39 C40 -3(3) . . . . ? 
C38 C39 C40 C41 4(3) . . . . ? 
C39 C40 C41 C42 -4(3) . . . . ? 
C38 C37 C42 C41 -2.2(17) . . . . ? 
O8 C37 C42 C41 176.4(10) . . . . ? 
C40 C41 C42 C37 3(2) . . . . ? 
  
_diffrn_measured_fraction_theta_max    0.992 
_diffrn_reflns_theta_full              25.11 
_diffrn_measured_fraction_theta_full   0.992 
_refine_diff_density_max    1.505 
_refine_diff_density_min   -0.851 
_refine_diff_density_rms    0.141 
